# Supplementary material for: Yolk–shell NiSx@C nanosheets as K-ion battery anodes with high rate capability and ultralong cycle life
Source: Royal Society of Chemistry journal article supplement (doi:10.1039/c9ta06292k), 2019-01-01
Supplement: c9ta06292k1.pdf [file c9ta06292k1.pdf]

## Supporting Information for

# Yolk-shell NiS<sub>x</sub>@C nanosheets as K-ion battery anode with high rate capability and ultralong cycle life

Qianqian Yao,<sup>a</sup> Jianshuo Zhang,<sup>a</sup> Jiaxin Li,<sup>b</sup> Weijian Huang,<sup>b</sup> Kun Hou,<sup>a</sup> Yi Zhao,<sup>\*a</sup>

Lunhui Guan<sup>\*a</sup>

<sup>a</sup>CAS Key Laboratory of Design and Assembly of Functional Nanostructures, Fujian Key Laboratory of Nanomaterials, Fujian Institute of Research on the Structure of Matter, Chinese Academy of Sciences, Fuzhou 350108, China.  
E-mail: zhaoyi@fjirsm.ac.cn, guanlh@fjirsm.ac.cn

<sup>b</sup>College of Physics and Energy, Fujian Provincial Key Laboratory of Quantum Manipulation and New Energy Materials, Fujian Normal University, Fuzhou, 350117, China.

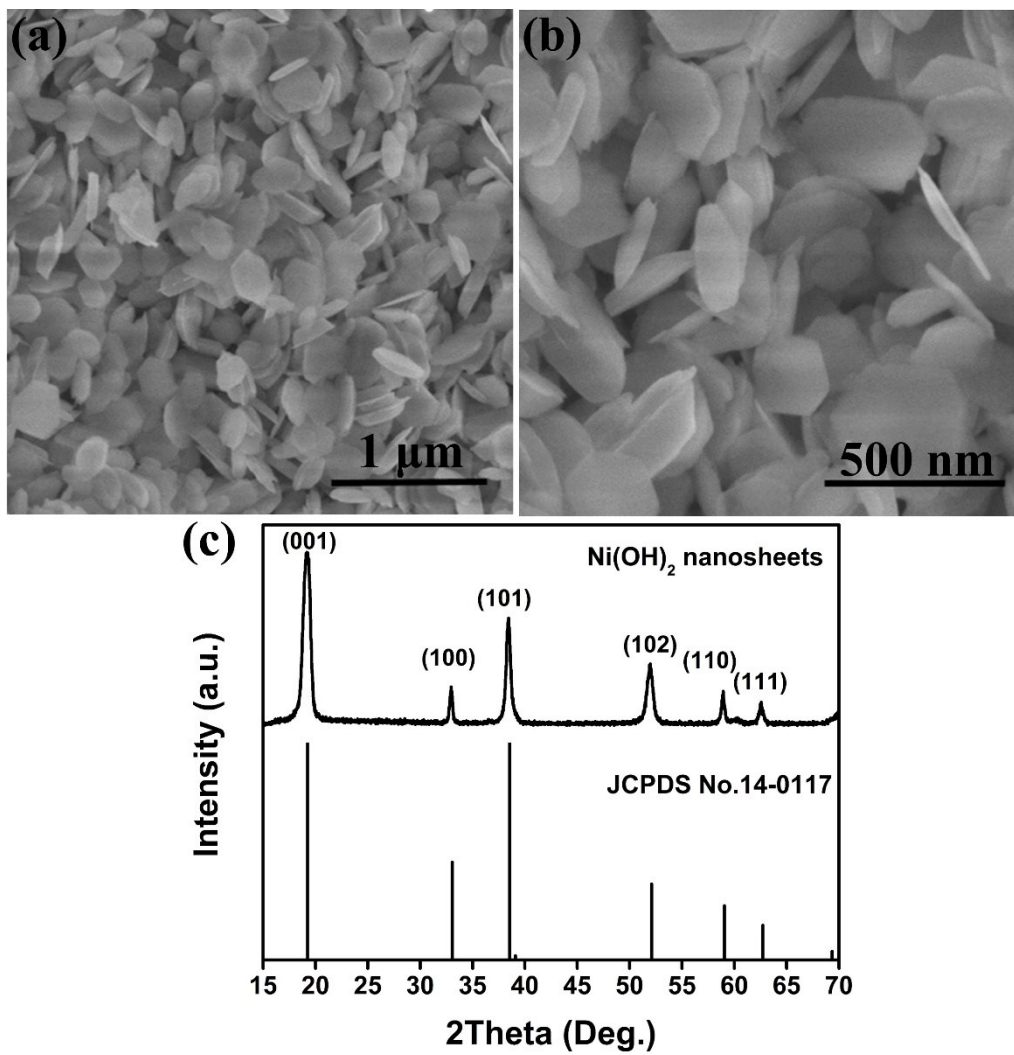

Fig. S1 (a-b) SEM images, and (c) XRD pattern of Ni(OH)<sub>2</sub> nanosheets.

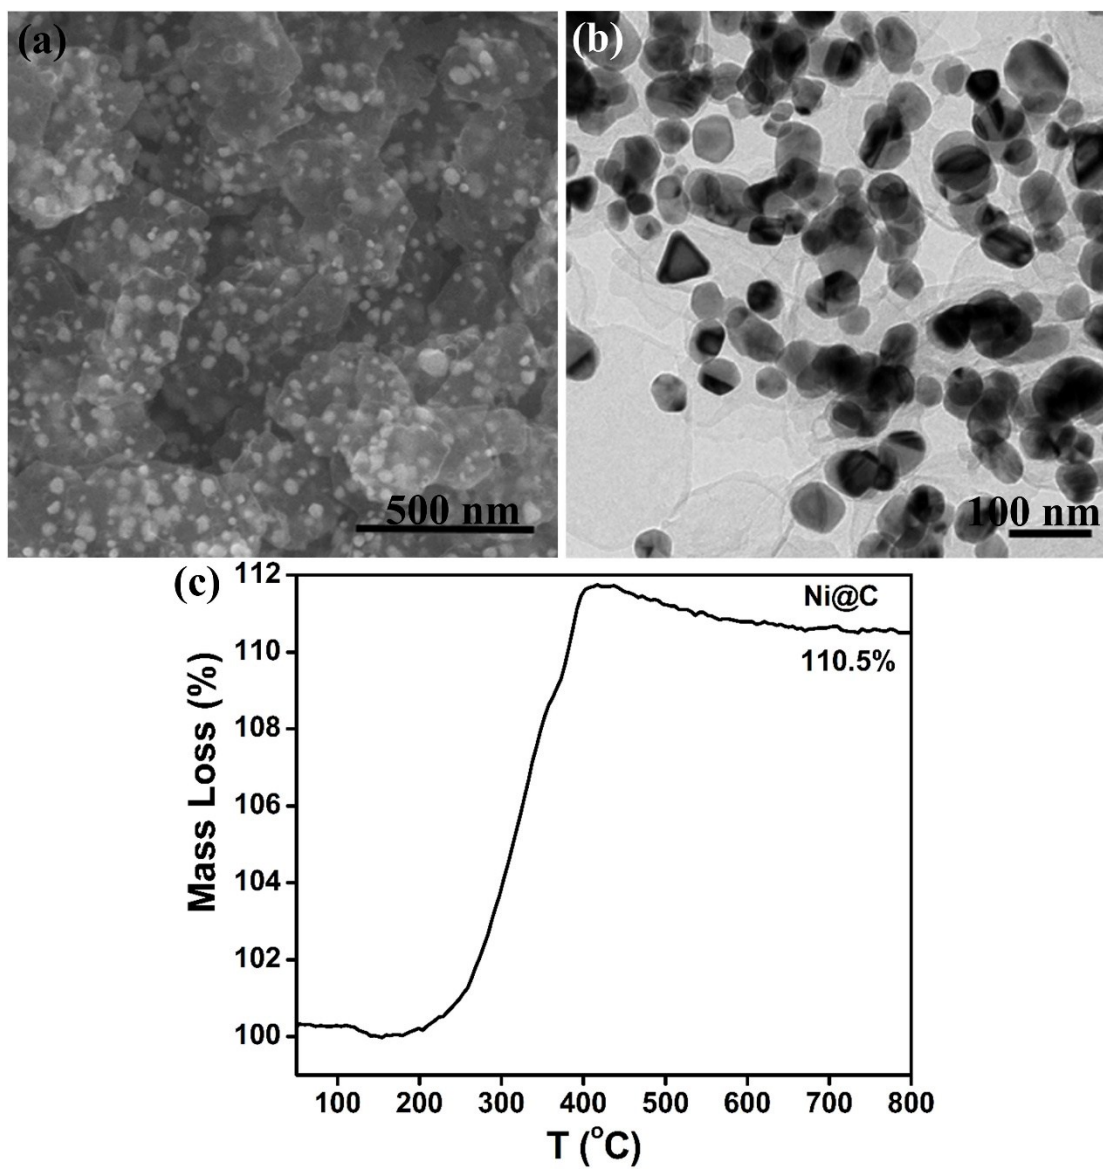

**Fig. S2** (a) SEM and (b) TEM images, and (c) TGA curve of Ni@C composite.

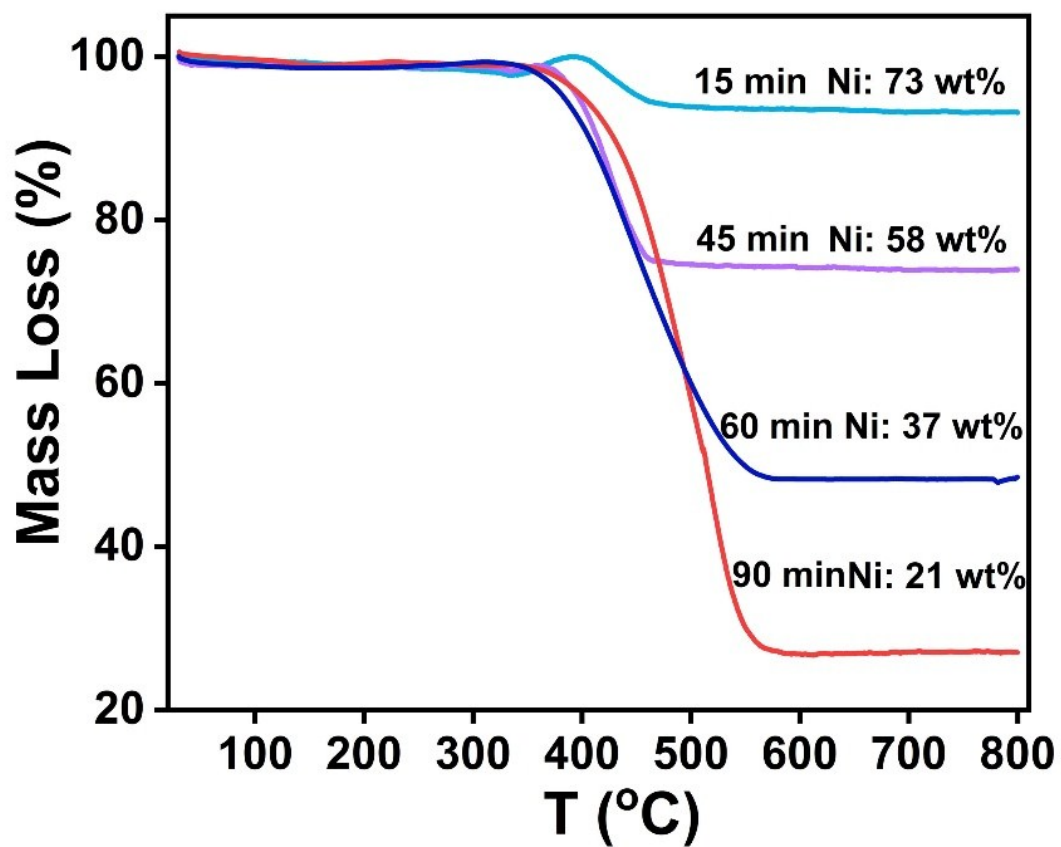

Fig. S3 TGA curves of Y-S Ni@C under different etch time.

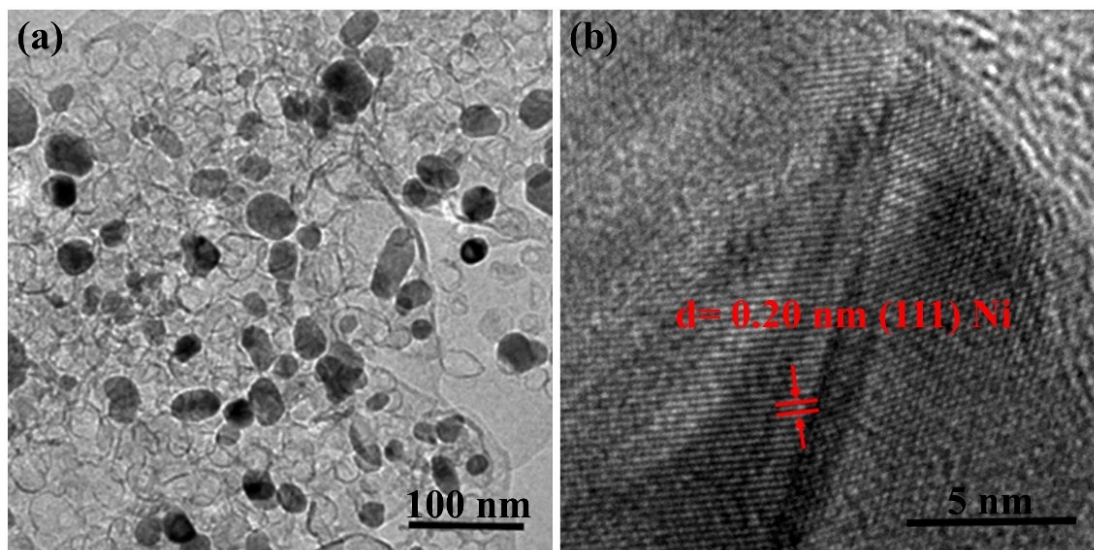

**Fig. S4** (a) TEM and (b) HRTEM images of Y-S Ni@C composite.

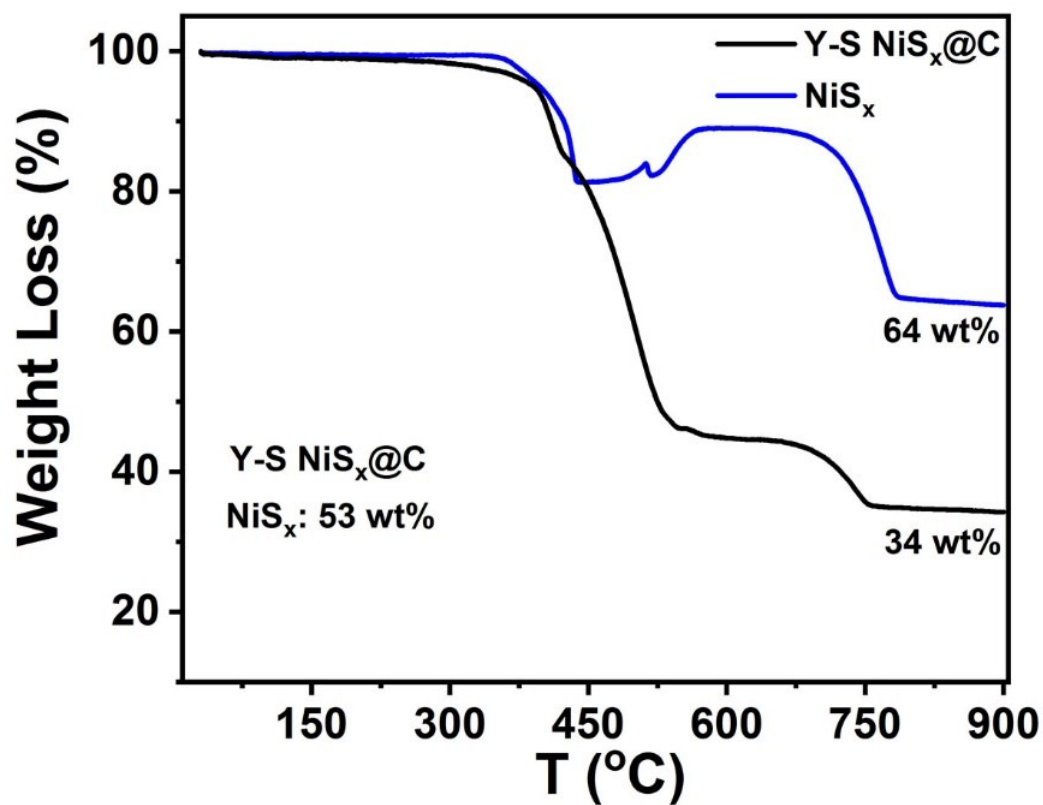

Fig. S5 TGA curves of NiS<sub>x</sub> and Y-S NiS<sub>x</sub>@C composite.

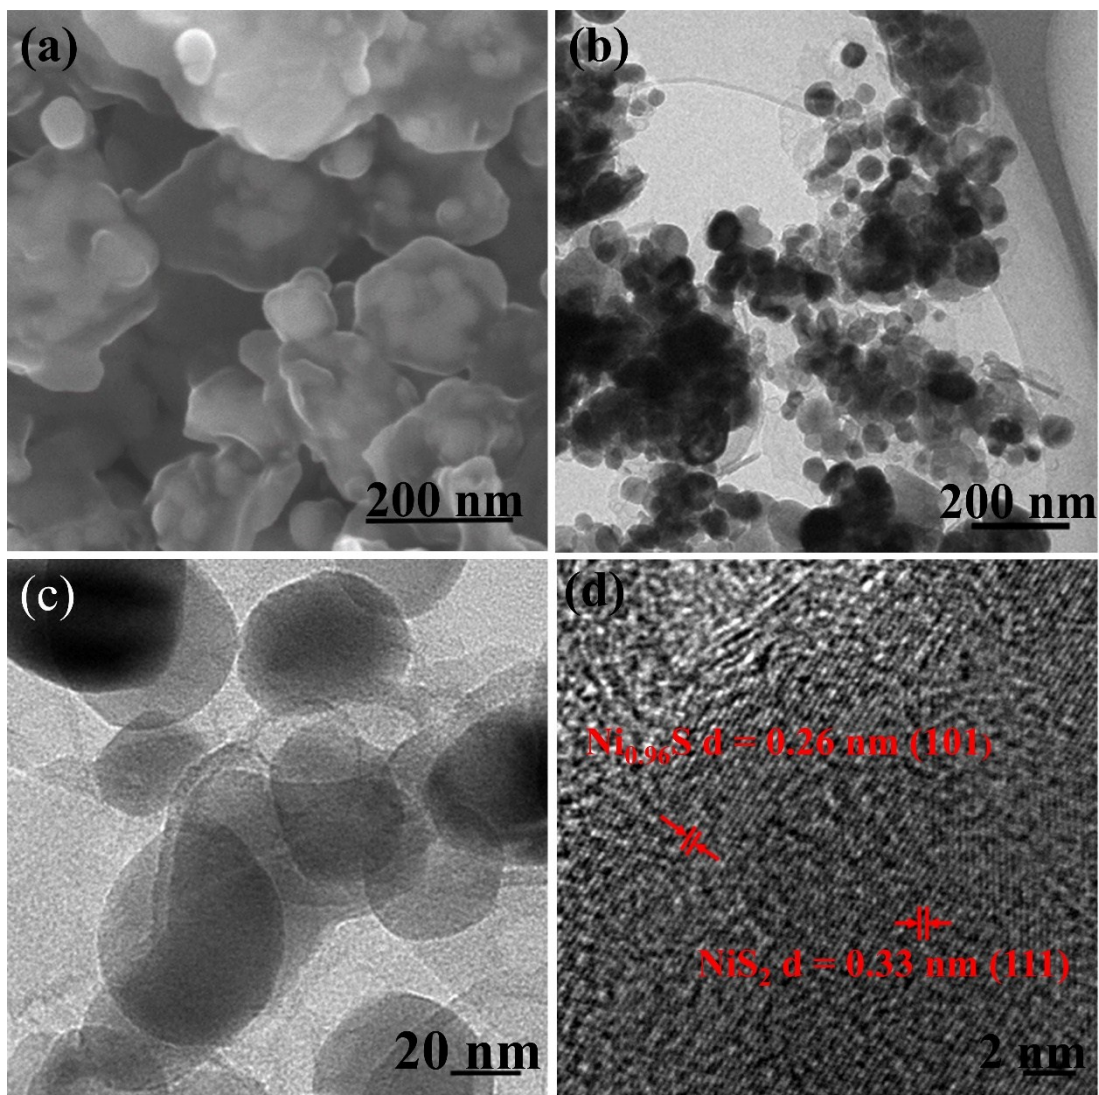

**Fig. S6** (a) SEM, (b-c) TEM, and (d) HRTEM images of  $\text{NiS}_x@C$  composite.

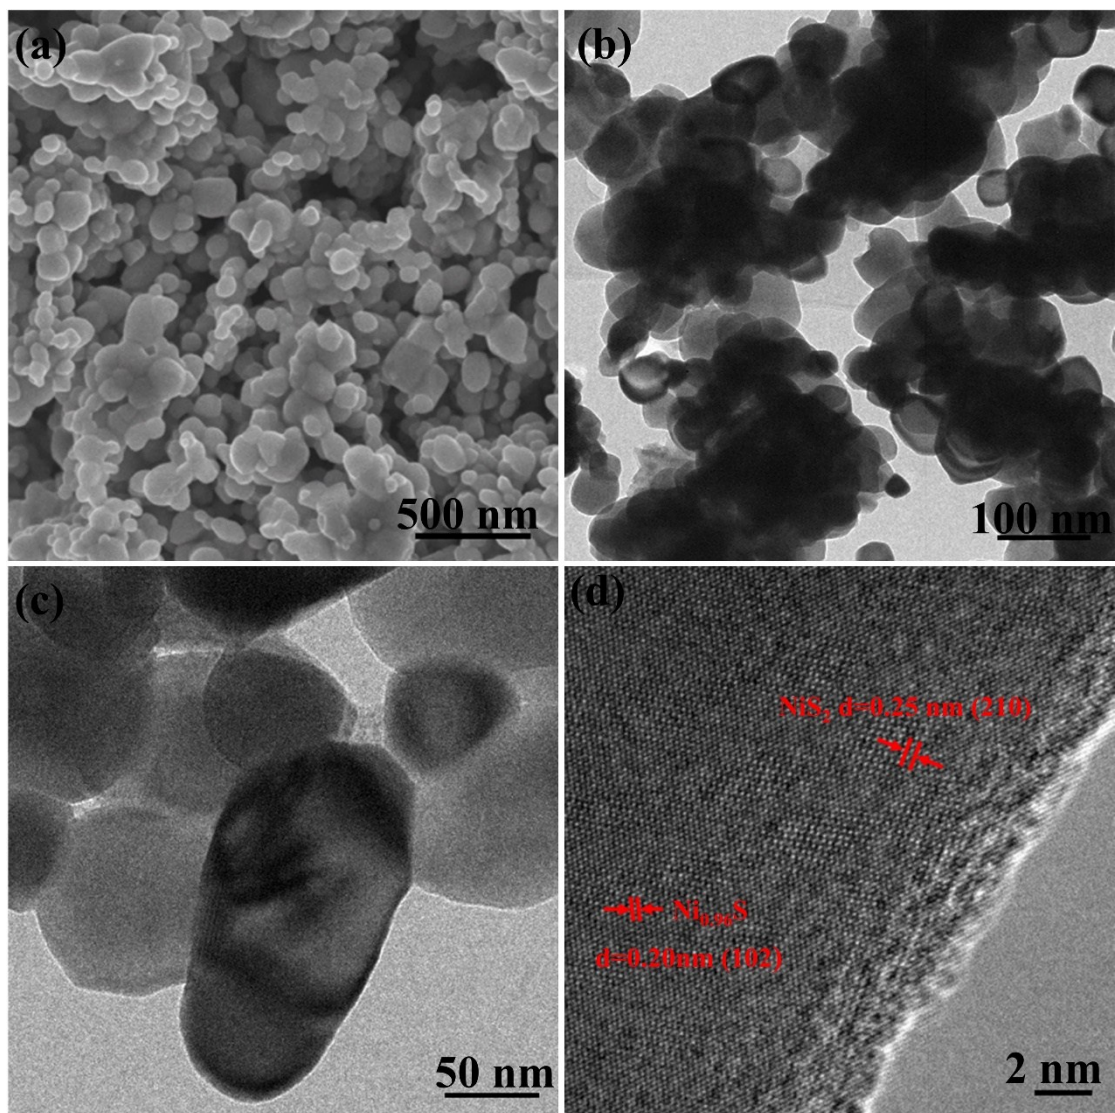

**Fig. S7** (a) SEM, (b-c) TEM, and (d) HRTEM images of  $\text{NiS}_x$ .



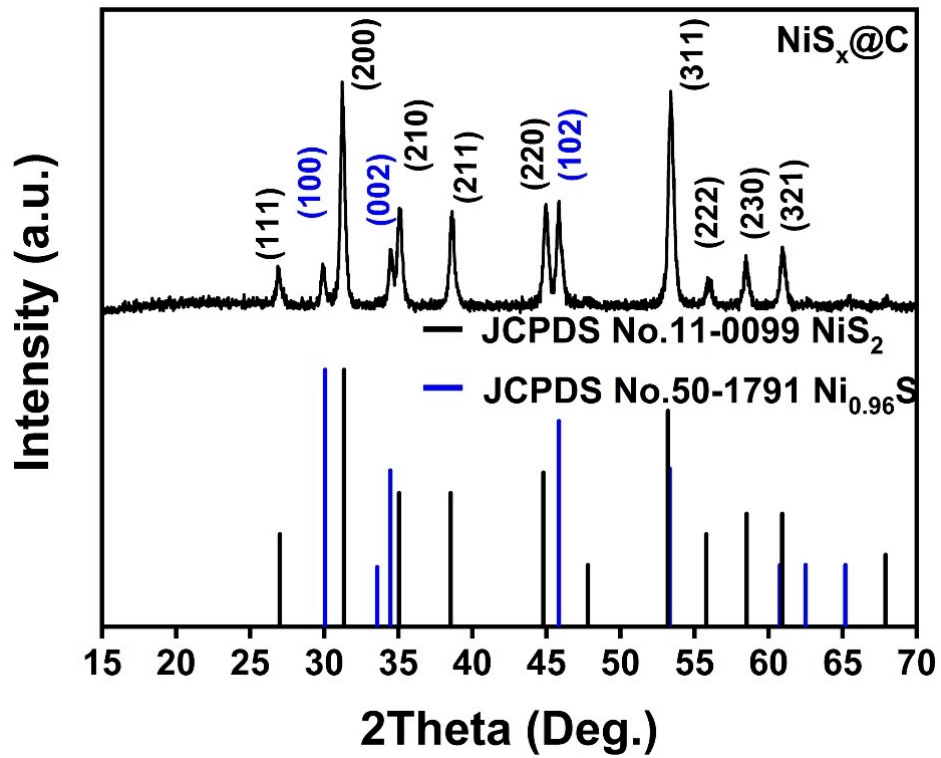

Fig. S8 XRD pattern of  $\text{NiS}_x\text{@C}$  composite.

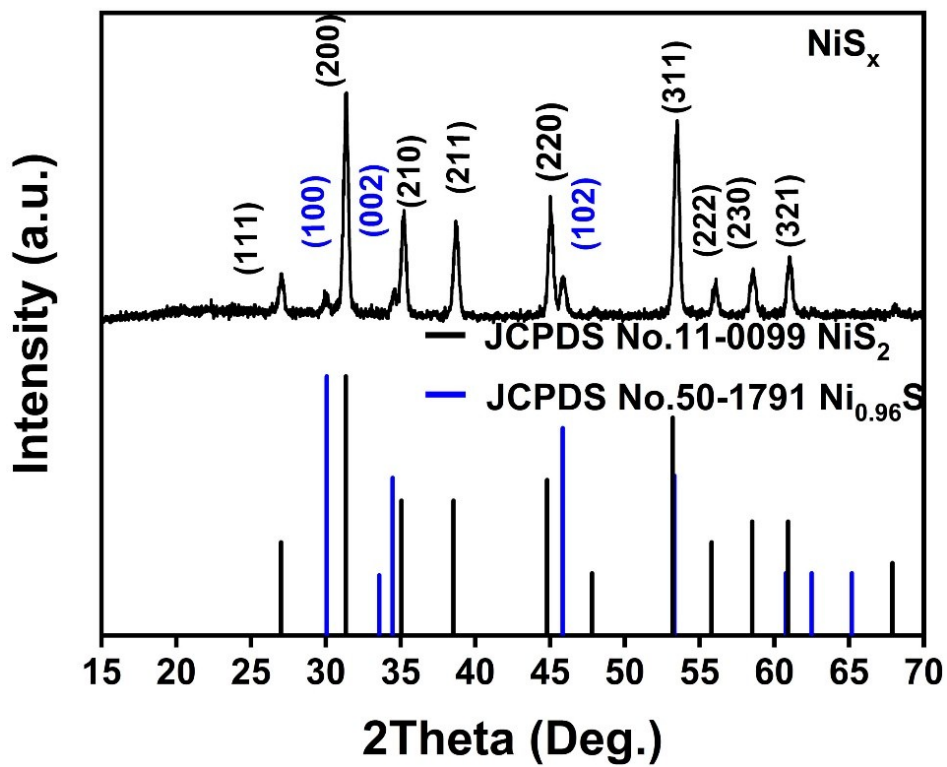

Fig. S9 XRD pattern of  $\text{NiS}_x$ .

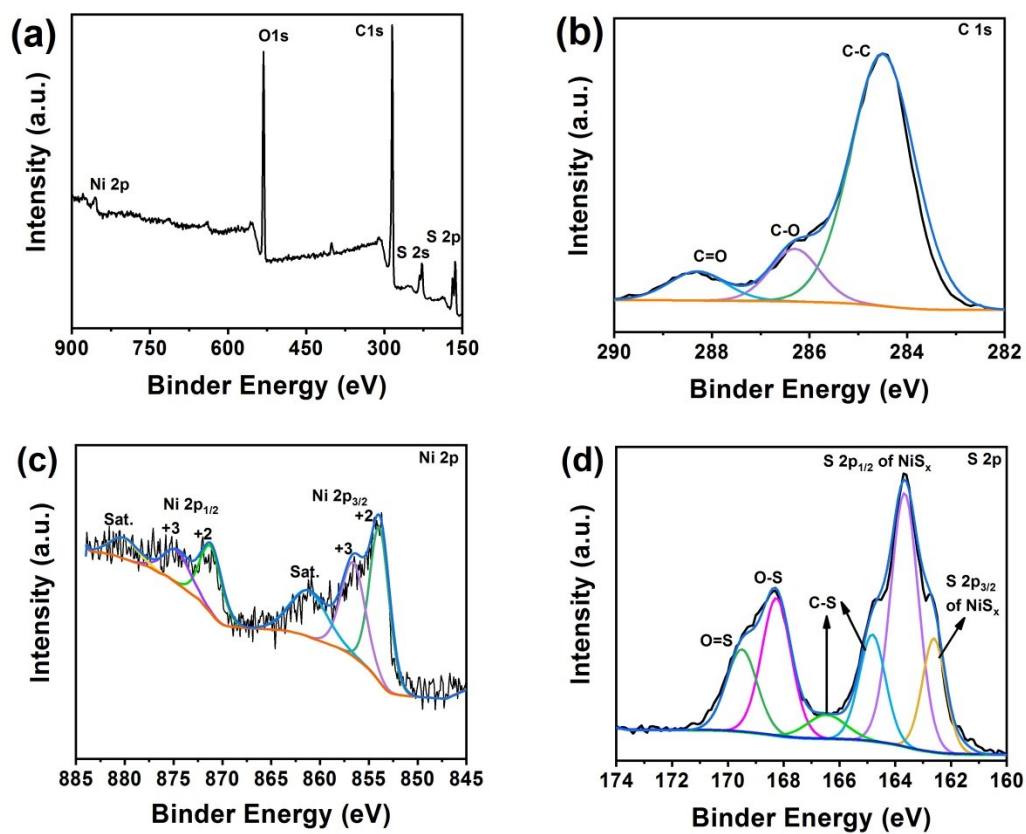

**Fig. S10** XPS spectra of Y-S NiS<sub>x</sub>@C composite: (a) survey spectrum, (b) C1s, (c) Ni 2p and (d) S 2p.

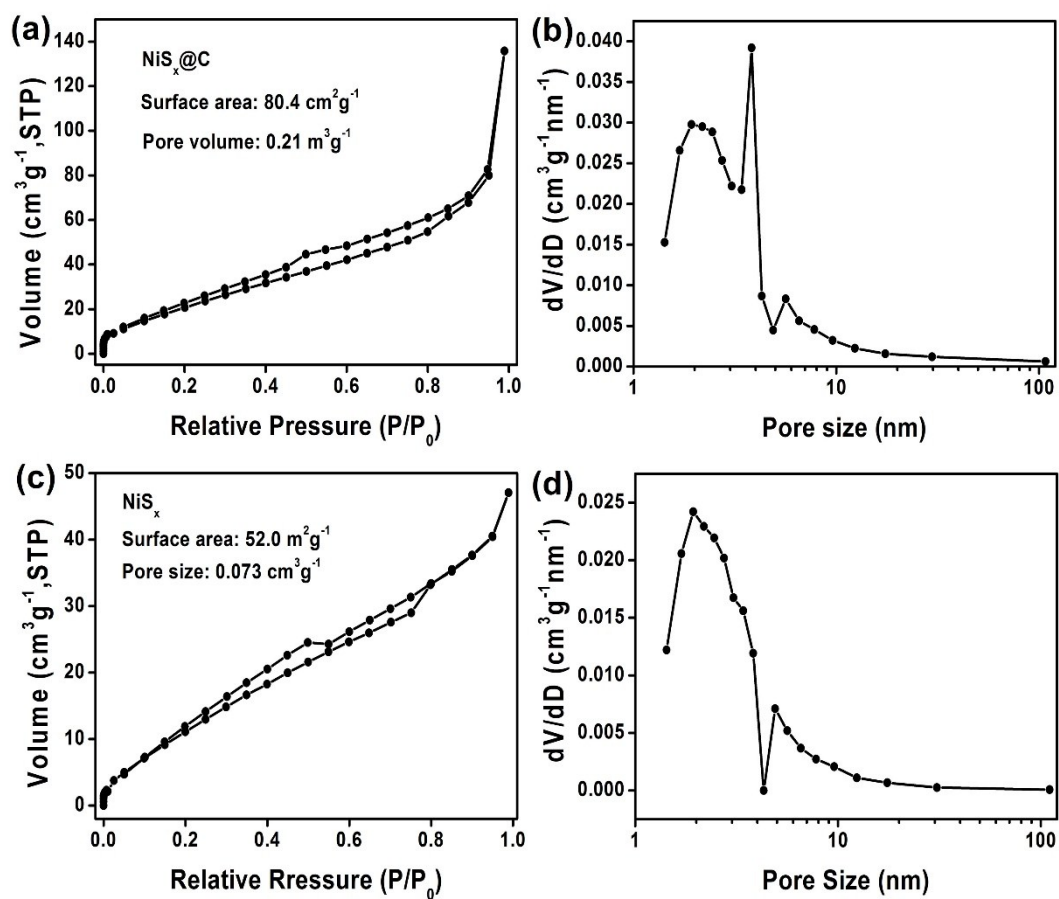

**Fig. S11** (a, c)  $\text{N}_2$  adsorption-desorption isotherms, (b, d) pore size distributions of (a-b)  $\text{NiS}_x\text{@C}$  and (c-d)  $\text{NiS}_x$ .

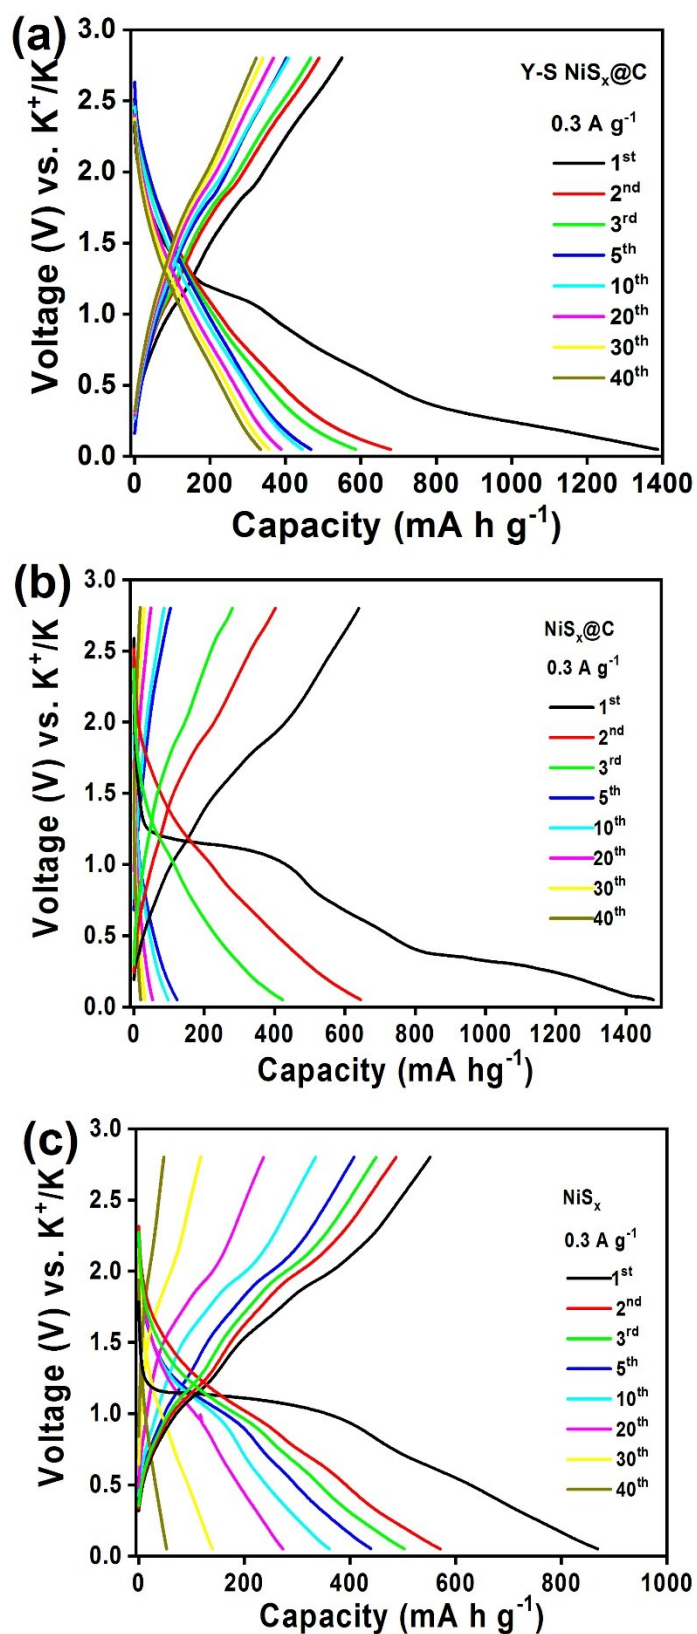

**Fig. S12** Discharge/charge profiles at selected cycles at  $0.3 \text{ A g}^{-1}$  of (a) Y-S  $\text{NiS}_x$ @C composite, (b)  $\text{NiS}_x$ @C composite, and (c)  $\text{NiS}_x$  for PIBs.

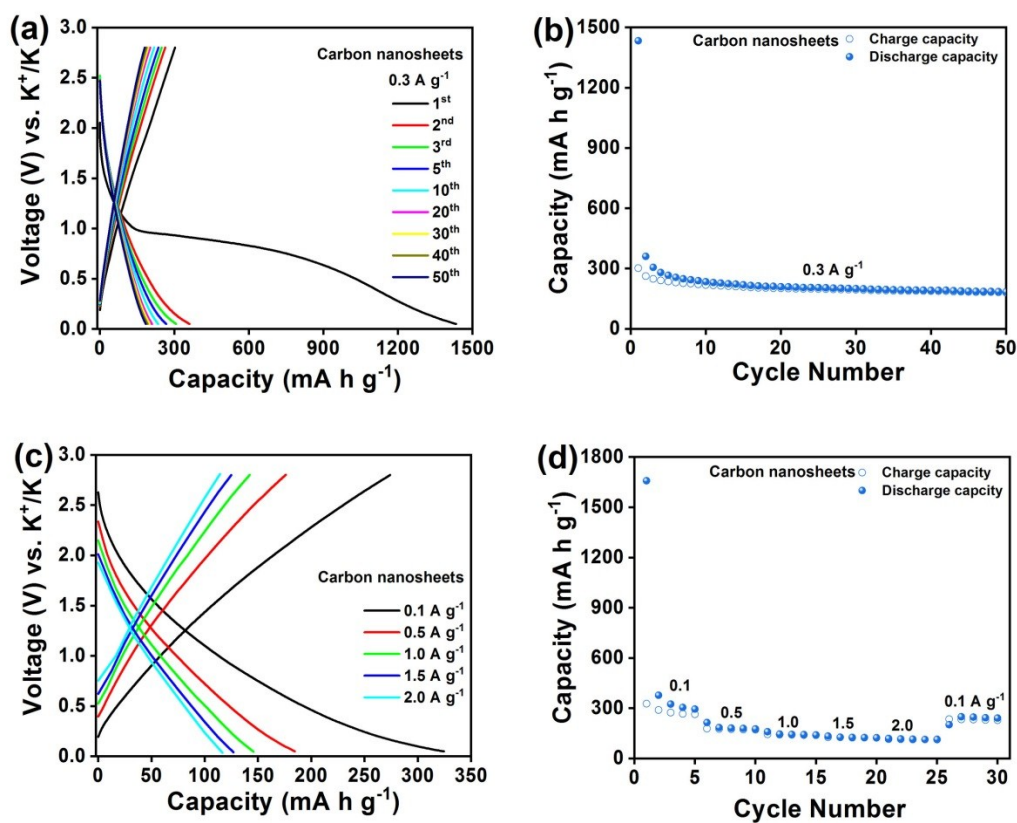

**Fig. S13** (a) Discharge/charge profiles at selected cycles, and (b) cycle performance of carbon nanosheets at  $0.3 \text{ A g}^{-1}$ . (c) Discharge/charge profiles at various densities, and (d) rate performance from  $0.1$  to  $2.0 \text{ A g}^{-1}$  of carbon nanosheets for PIBs

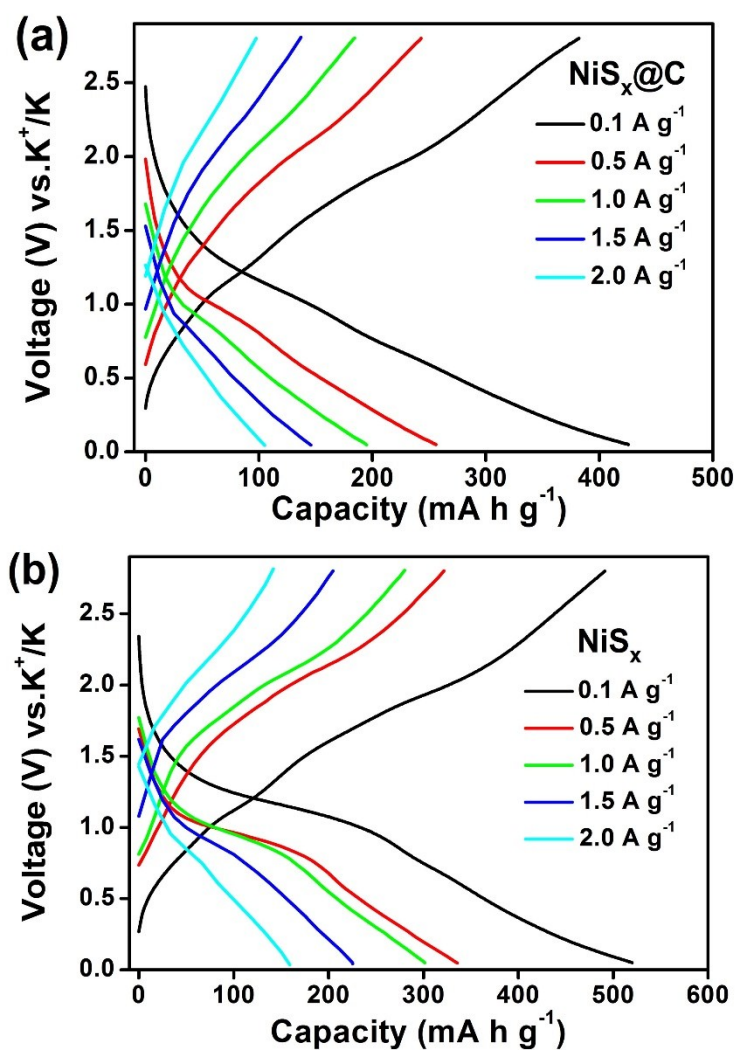

**Fig. S14** Discharge/charge profiles at various current densities from 0.1 to 2.0 A g<sup>-1</sup> of (a) NiS<sub>x</sub>@C composite, and (b) NiS<sub>x</sub> for PIBs.

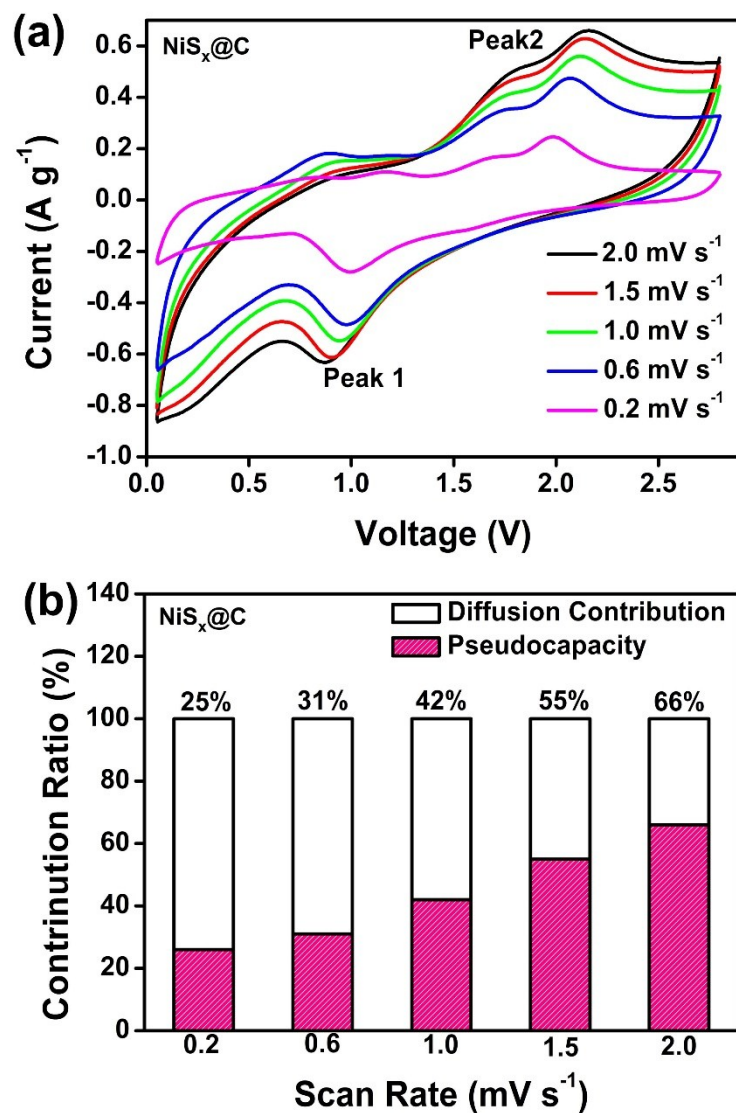

**Fig. S15** (a) CV curves at various scan rates of initial state, and (b) contribution ratio of diffusion and pseudocapacity-controlled capacities of  $\text{NiS}_x\text{@C}$  anode from 0.2 to  $2.0 \text{ mV s}^{-1}$ .

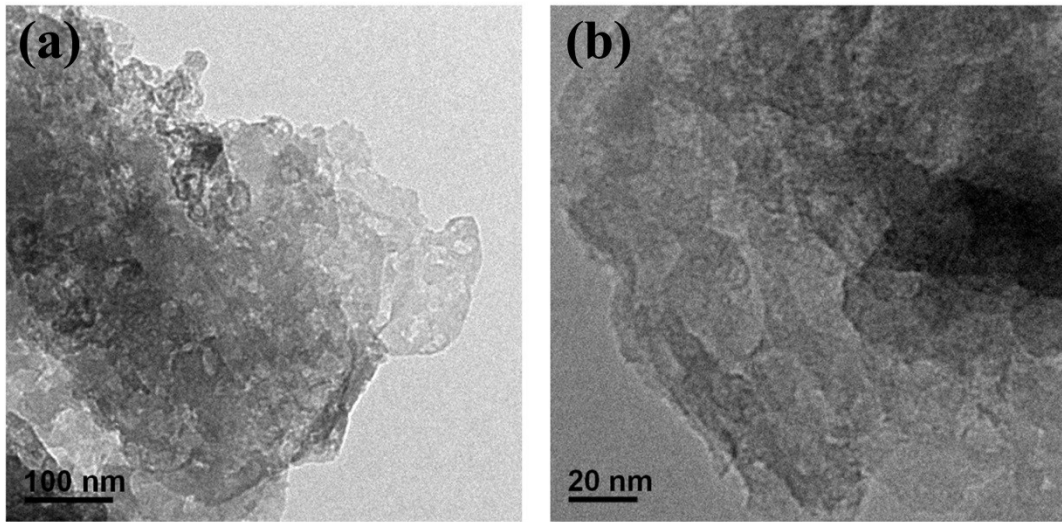

**Fig. S16** (a-b) TEM images of Y-S NiS<sub>x</sub>@C electrode after cycles.



**Table. S1** Comparison of cycle and rate capabilities between Y-S NiS<sub>x</sub>@C composite and as-reported anode materials for PIBs.

| <b>Materials</b>                         | <b>Current density (A g<sup>-1</sup>)</b> | <b>Cycle Number</b> | <b>Capacity (mAh g<sup>-1</sup>)</b> | <b>Rate Capability (mAh g<sup>-1</sup>/A g<sup>-1</sup>)</b> | <b>Ref.</b> |
|------------------------------------------|-------------------------------------------|---------------------|--------------------------------------|--------------------------------------------------------------|-------------|
| <b>CoS@rGO</b>                           | 0.5                                       | 100                 | 310                                  | 232/2.3                                                      | 1           |
| <b>SnS<sub>2</sub>-rGO</b>               | 0.025                                     | 30                  | 250                                  | -                                                            | 2           |
| <b>SnS<sub>2</sub>@rGO</b>               | 1.0                                       | 300                 | 205                                  | 247/1.0                                                      | 3           |
| <b>MoS<sub>2</sub>@rGO</b>               | 0.1                                       | 100                 | 380                                  | 178/0.5                                                      | 4           |
| <b>MoS<sub>2</sub>/N-doped-C</b>         | 0.05                                      | 30                  | 330                                  | 131/2.0                                                      | 5           |
| <b>MoS<sub>2</sub>/C</b>                 | 0.05                                      | 35                  | 391                                  | 164/2.0                                                      | 6           |
| <b>MoS<sub>2</sub>@SnO<sub>2</sub>@C</b> | 0.05                                      | 25                  | 312                                  | 86/0.8                                                       | 7           |
| <b>FeS<sub>2</sub>@rGO</b>               | 0.05                                      | 50                  | 264                                  | 151/0.5                                                      | 8           |
| <b>Fe<sub>3</sub>S<sub>4</sub>@C</b>     | 0.1                                       | 100                 | 226                                  | 139/1.0                                                      | 9           |
| <b>ReS<sub>2</sub>/N-CNFs</b>            | 0.05                                      | 100                 | 235                                  | -                                                            | 10          |
| <b>MoSe<sub>2</sub>@N-C</b>              | 0.1                                       | 100                 | 258                                  | 218/0.5                                                      | 11          |
| <b>MoS<sub>2</sub>/C</b>                 | 0.1                                       | 50                  | 239                                  | 123/0.8                                                      | 12          |
| <b>Sb<sub>2</sub>S<sub>3</sub>-SNG</b>   | 0.05                                      | 100                 | 330                                  | -                                                            | 13          |
| <b>MoSe<sub>2</sub>/C</b>                | 1.0                                       | 1000                | 226                                  | 224/2.0                                                      | 14          |
| <b>CoSe<sub>2</sub>@NCT</b>              | 0.2                                       | 100                 | 253                                  | 196/2.0                                                      | 15          |
| <b>VSe<sub>2</sub> nanosheets</b>        | 2.0                                       | 500                 | 335                                  | 269/1.0                                                      | 16          |
| <b>ReSe<sub>2</sub>@G@CNTs</b>           | 0.2                                       | 200                 | 230                                  | 157/2.0                                                      | 17          |
| <b>FeP@CNBs</b>                          | 0.1                                       | 300                 | 205                                  | 37/2.0                                                       | 18          |
| <b>SnP<sub>0.96</sub>@GO</b>             | 0.2                                       | 100                 | 106                                  | 57/1.0                                                       | 19          |
| <b>Sn<sub>4</sub>P<sub>3</sub>@C</b>     | 0.5                                       | 800                 | 181                                  | 183/2.0                                                      | 20          |
| <b>V<sub>2</sub>O<sub>3</sub>@PNCNFs</b> | 0.05                                      | 500                 | 240                                  | 134/1.0                                                      | 21          |
| <b>SnO<sub>2</sub>-rGO</b>               | 0.1                                       | 60                  | 286                                  | 208/1.0                                                      | 22          |
| <b>MoO<sub>2</sub>/rGO</b>               | 0.05                                      | 200                 | 219                                  | 176/0.5                                                      | 23          |
| <b>Sn@C</b>                              | 0.05                                      | 100                 | 276                                  | 150/0.5                                                      | 24          |
| <b>Sb/PC</b>                             | 0.5                                       | 200                 | 90                                   | 70/2.0                                                       | 25          |
| <b>Sb/rGO</b>                            | 0.5                                       | 200                 | 210                                  | 222/1.0                                                      | 26          |
| <b>3D SbNPs@C</b>                        | 1.0                                       | 50                  | 225                                  | 288/1.0                                                      | 27          |
| <b>Sb@C-3DP.</b>                         | 0.5                                       | 260                 | 342                                  | 286/1.0                                                      | 28          |

|                              |            |             |            |                |                  |
|------------------------------|------------|-------------|------------|----------------|------------------|
| <b>Sb@NPMC</b>               | 0.05       | 50          | 226        | 161/1.0        | 29               |
|                              | <b>0.1</b> | <b>300</b>  | <b>300</b> |                |                  |
| <b>Y-S NiS<sub>x</sub>@C</b> | <b>0.3</b> | <b>5000</b> | <b>173</b> | <b>232/2.0</b> | <b>This work</b> |
|                              | <b>0.5</b> | <b>8000</b> | <b>128</b> |                |                  |

## Reference

1. H. Gao, T. Zhou, Y. Zheng, Q. Zhang, Y. Liu, J. Chen, H. Liu and Z. Guo, *Adv. Funct. Mater.*, 2017, **27**, 1702634.
2. V. Lakshmi, Y. Chen, A. A. Mikhaylov, A. G. Medvedev, I. Sultana, M. M. Rahman, O. Lev, P. V. Prikhodchenko and A. M. Glushenkov, *Chem. Commun.*, 2017, **53**, 8272-8275.
3. L. Fang, J. Xu, S. Sun, B. Lin, Q. Guo, D. Luo and H. Xia, *Small*, 2019, **15**, 1804806.
4. K. Xie, K. Yuan, X. Li, W. Lu, C. Shen, C. Liang, R. Vajtai, P. Ajayan and B. Wei, *Small*, 2017, **13**, 1701471.
5. B. Jia, Q. Yu, Y. Zhao, M. Qin, W. Wang, Z. Liu, C.-Y. Lao, Y. Liu, H. Wu, Z. Zhang and X. Qu, *Adv. Funct. Mater.*, 2018, **30**, 1803409.
6. B. Jia, Y. Zhao, M. Qin, W. Wang, Z. Liu, C.-Y. Lao, Q. Yu, Y. Liu, H. Wu, Z. Zhang and X. Qu, *J. Mater. Chem. A*, 2018, **6**, 11147-11153.
7. Z. Chen, D. Yin and M. Zhang, *Small*, 2018, **14**, 1703818.
8. J. Xie, Y. Zhu, N. Zhuang, H. Lei, W. Zhu, Y. Fu, M. S. Javed, J. Li and W. Mai, *Nanoscale*, 2018, **10**, 17092-17098.
9. Q. Yu, J. Hu, Y. Gao, J. Gao, G. Suo, P. Zuo, W. Wang and G. Yin, *J. Alloys*

- Compounds*, 2018, **766**, 1086-1091.
10. M. Mao, C. Cui, M. Wu, M. Zhang, T. Gao, X. Fan, J. Chen, T. Wang, J. Ma and C. Wang, *Nano Energy*, 2018, **45**, 346-352.
  11. J. Ge, L. Fan, J. Wang, Q. Zhang, Z. Liu, E. Zhang, Q. Liu, X. Yu and B. Lu, *Adv. Energy Mater.*, 2018, **30**, 1801477.
  12. D. Yin, Z. Chen and M. Zhang, *J. Phy. Chem. Solids*, 2019, **126**, 72-77.
  13. Y. Lu and J. Chen, *Sci. China Chem.*, 2017, **60**, 1533-1539.
  14. W. Wang, B. Jiang, C. Qian, F. Lv, J. Feng, J. Zhou, K. Wang, C. Yang, Y. Yang and S. Guo, *Adv. Mater.*, 2018, **30**, 1801812.
  15. Q. Yu, B. Jiang, J. Hu, C.-Y. Lao, Y. Gao, P. Li, Z. Liu, G. Suo, D. He, W. A. Wang and G. Yin, *Adv. Sci.*, 2018, **5**, 1800782.
  16. C. Yang, J. Feng, F. Lv, J. Zhou, C. Lin, K. Wang, Y. Zhang, Y. Yang, W. Wang, J. Li and S. Guo, *Adv. Mater.*, 2018, **30**, 1800036.
  17. Y. Liao, C. Chen, D. Yin, Y. Cai, R. He and M. Zhang, *Nano-Micro Lett.*, 2019, **11**, 2150-5551.
  18. F. Yang, H. Gao, J. Hao, S. Zhang, P. Li, Y. Liu, J. Chen and Z. Guo, *Adv. Funct. Mater.*, 2019, **29**, 1808291.
  19. X. Zhao, W. Wang, Z. Hou, G. Wei, Y. Yu, J. Zhang and Z. Quan, *Chem. Eng. J.*, 2019, **370**, 677-683.
  20. D. Li, Y. Zhang, Q. Sun, S. Zhang, Z. Wang, Z. Liang, P. Si and L. Ci, *Energy Storage Mater.*, 2019. 10.1016/j.ensm.2019.04.037.
  21. T. Jin, H. Li, Y. Li, L. Jiao and J. Chen, *Nano Energy*, 2018, **50**, 462-467.

22. Z. Huang, Z. Chen, S. Ding, C. Chen and M. Zhang, *Nanotechnology*, 2018, **29**, 375702.
23. C. Liu, S. Luo, H. Huang, Y. Zhai and Z. Wang, *ChemSusChem*, 2019, **12**, 873-880.
24. K. Huang, Z. Xing, L. Wang, X. Wu, W. Zhao, X. Qi, H. Wang and Z. Ju, *J. Mater. Chem. A*, 2018, **6**, 434-442.
25. H. Wang, X. Wu, X. Qi, W. Zhao and Z. Ju, *Mater. Res. Bull.*, 2018, **103**, 32-37.
26. Z. Yi, N. Lin, W. Zhang, W. Wang, Y. Zhu and Y. Qian, *Nanoscale*, 2018, **10**, 13236-13241.
27. C. Han, K. Han, X. Wang, C. Wang, Q. Li, J. Meng, X. Xu, Q. He, W. Luo, L. Wu and L. Mai, *Nanoscale*, 2018, **10**, 6820-6826.
28. J. Zheng, Y. Yang, X. Fan, G. Ji, X. Ji, H. Wang, S. Hou, M. R. Zachariah and C. Wang, *Energy Environ. Sci.*, 2019, **12**, 615-623.
29. L. Wang, J. Jia, Y. Wu and K. Niu, *J. Appl. Electrochem.*, 2018, **10**, 1115–1120.
